# Supplementary material for: Acquisition Parameters Influence Diffusion Metrics Effectiveness in Probing Prostate Tumor and Age-Related Microstructure
Source: MDPI journal article supplement (doi:10.3390/jpm13050860), 2023-05-20
Supplement: s1 [file s1]

## Supplementary Information

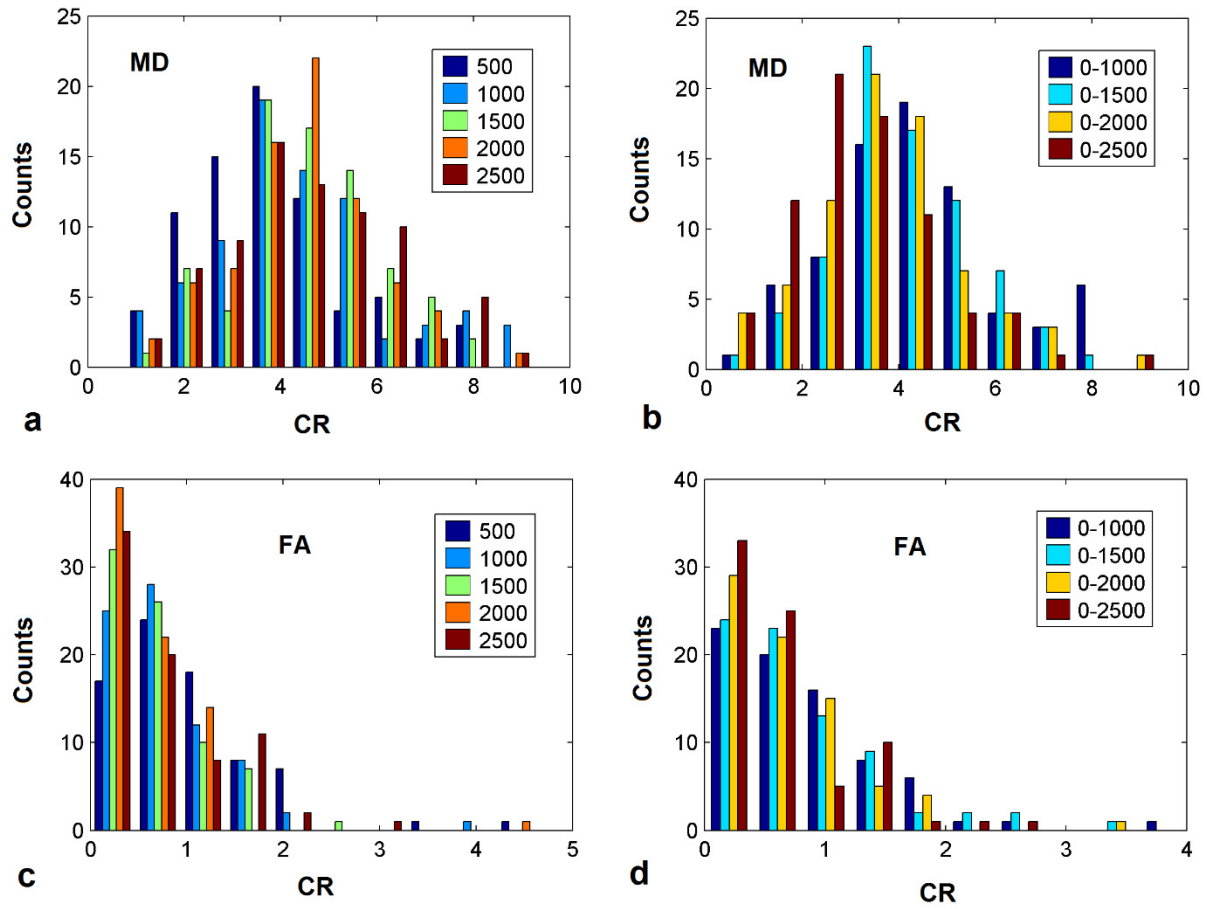

**Figure S1. Contrast ratio (CR) of MD and FA between benign and cancerous tissue in the patients' cohort.** Histograms of CR computed in MD and FA maps at different b-values (a,c) and b-value ranges (b,d). Most of the lesions are better visualized in MD maps obtained at  $b=2000$  s/mm<sup>2</sup> while FA maps offer poor contrast, regardless of the b-value, as indicated by histograms skewed to the left.

**Table S1. The area under the curve (AUC), specificity (Sp), and sensibility (Se) obtained from ROC curve analysis for the classification of benign and PCa tissue.**

| <b>b-value<br/>(s/mm<sup>2</sup>)</b>           | <b>MD</b>  |           |           | <b>D//</b> |           |           | <b>D<sup>⊥</sup></b> |           |           | <b>FA</b>  |           |           |
|-------------------------------------------------|------------|-----------|-----------|------------|-----------|-----------|----------------------|-----------|-----------|------------|-----------|-----------|
|                                                 | <b>AUC</b> | <b>Sp</b> | <b>Se</b> | <b>AUC</b> | <b>Sp</b> | <b>Se</b> | <b>AUC</b>           | <b>Sp</b> | <b>Se</b> | <b>AUC</b> | <b>Sp</b> | <b>Se</b> |
| 500                                             | 1          | 1         | 0.97      | 1          | 0.97      | 0.99      | 1                    | 0.97      | 1         | 0.84       | 0.7       | 0.86      |
| 1000                                            | 1          | 0.99      | 1         | 0.99       | 1         | 0.97      | 0.99                 | 1         | 0.99      | 0.75       | 0.84      | 0.55      |
| 1500                                            | 1          | 1         | 1         | 1          | 1         | 1         | 1                    | 1         | 1         | 0.7        | 0.79      | 0.57      |
| 2000                                            | 1          | 0.97      | 1         | 1          | 0.97      | 1         | 1                    | 0.97      | 1         | 0.67       | 0.86      | 0.5       |
| 2500                                            | 1          | 0.99      | 0.99      | 1          | 0.96      | 1         | 1                    | 0.96      | 1         | 0.8        | 0.87      | 0.62      |
| <b>b-value<br/>range<br/>(s/mm<sup>2</sup>)</b> | <b>MD</b>  |           |           | <b>D//</b> |           |           | <b>D<sup>⊥</sup></b> |           |           | <b>FA</b>  |           |           |
|                                                 | <b>AUC</b> | <b>Sp</b> | <b>Se</b> | <b>AUC</b> | <b>Sp</b> | <b>Se</b> | <b>AUC</b>           | <b>Sp</b> | <b>Se</b> | <b>AUC</b> | <b>Sp</b> | <b>Se</b> |
| 0-1000                                          | 1          | 1         | 0.97      | 0.98       | 0.99      | 0.99      | 0.98                 | 0.99      | 0.99      | 0.75       | 0.64      | 0.75      |
| 0-1500                                          | 1          | 0.99      | 1         | 1          | 0.99      | 1         | 1                    | 0.99      | 1         | 0.64       | 0.33      | 0.89      |
| 0-2000                                          | 0.99       | 0.96      | 1         | 0.99       | 0.97      | 1         | 0.99                 | 0.97      | 1         | 0.58       | 0.93      | 0.25      |
| 0-2500                                          | 0.98       | 0.91      | 1         | 0.98       | 0.97      | 0.95      | 0.98                 | 0.96      | 0.96      | 0.6        | 0.87      | 0.36      |

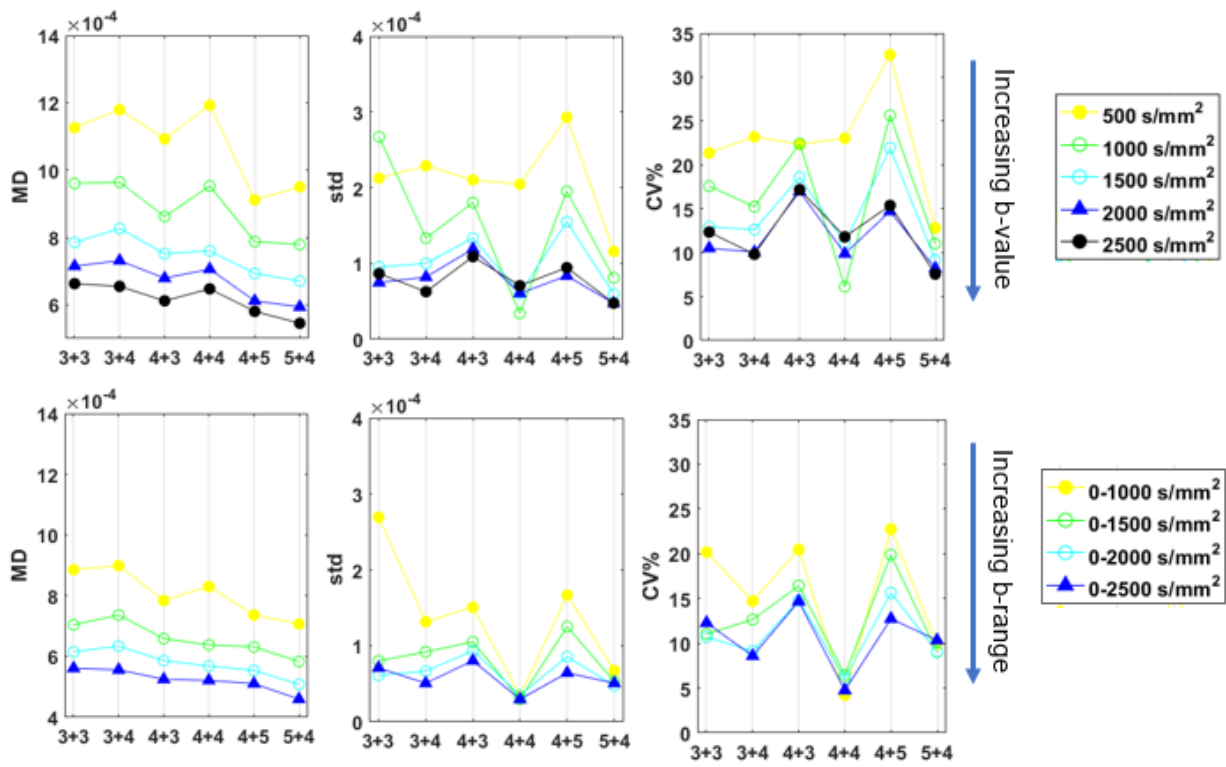

**Figure S2. Variability of MD estimate in PCa lesions.** MD was averaged over groups of lesions sharing the same Gleason Score, GS (a,d). Mean MD values and their standard deviations (b,e) are plotted towards b-values and b-ranges. The last column (c,f) shows the coefficient of variation, CV%. The legend indicates different b-values and b-value ranges.

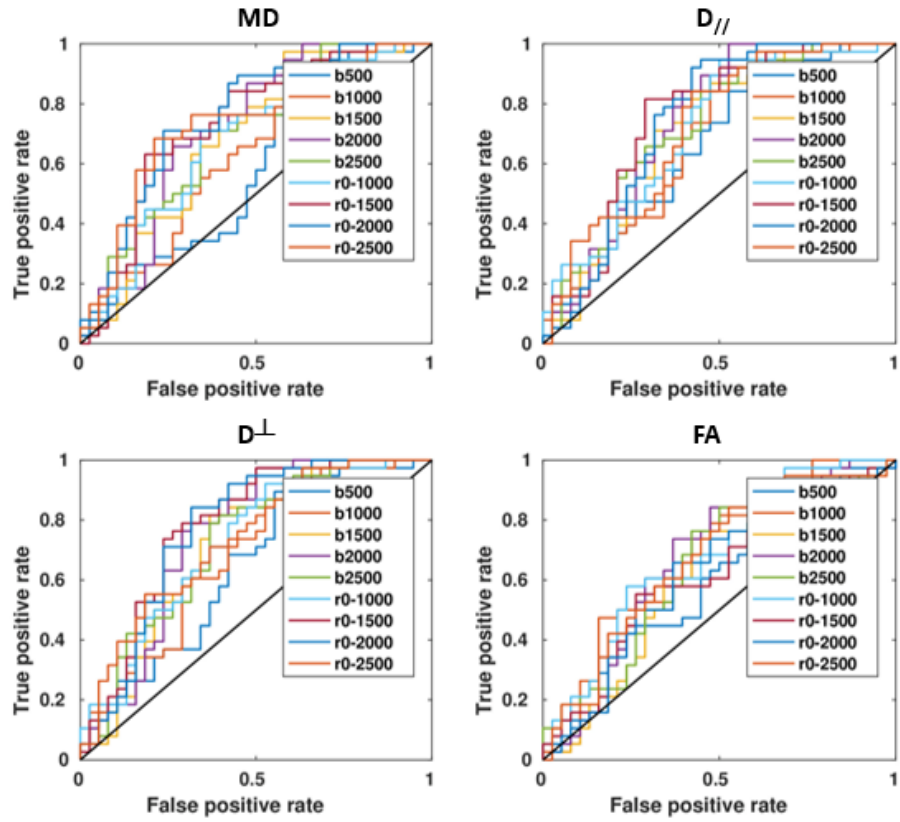

**Figure S3. ROC curves.** Diagnostic ability of DTI metrics (MD=mean diffusivity, D<sub>//</sub>=axial diffusivity, D<sub>⊥</sub>=radial diffusivity, FA=fractional anisotropy) in the discrimination between PCa lesions with low- vs high-Gleason grade, for each b-value (ranging from 500 to 2500 s/mm<sup>2</sup>) and b-value range (0-1000 to 0-2500 s/mm<sup>2</sup>).

Table S2. Pearson's correlation (r) between DTI parameters and GS for each considered b-value and b-value range (adjusted P = 0.0014; significant correlations are highlighted in bold).

| b-value<br>(s/mm <sup>2</sup> )          | MD    |                    | D//   |                    | D <sup>⊥</sup> |                    | FA    |      |
|------------------------------------------|-------|--------------------|-------|--------------------|----------------|--------------------|-------|------|
|                                          | r     | P                  | r     | P                  | r              | P                  | r     | P    |
| 500                                      | -0.25 | 0.03               | -0.33 | 0.003              | -0.32          | 0.004              | -0.13 | 0.3  |
| 1000                                     | -0.30 | 0.008              | -0.35 | 0.005              | -0.33          | 0.003              | -0.19 | 0.1  |
| 1500                                     | -0.34 | 0.003              | -0.35 | 0.002              | -0.39          | <b>0.0006</b>      | -0.12 | 0.3  |
| 2000                                     | -0.43 | <b>0.0001</b>      | -0.45 | <b>&lt; 0.0001</b> | -0.48          | <b>&lt; 0.0001</b> | -0.21 | 0.07 |
| 2500                                     | -0.39 | <b>0.0006</b>      | -0.42 | <b>0.0002</b>      | -0.44          | <b>&lt; 0.0001</b> | -0.25 | 0.03 |
| b-value<br>range<br>(s/mm <sup>2</sup> ) | MD    |                    | D//   |                    | D <sup>⊥</sup> |                    | FA    |      |
|                                          | r     | P                  | r     | P                  | r              | P                  | r     | P    |
| 0-1000                                   | -0.32 | 0.004              | -0.33 | 0.004              | -0.34          | 0.003              | -0.24 | 0.04 |
| 0-1500                                   | -0.38 | <b>0.0007</b>      | -0.39 | <b>0.0005</b>      | -0.45          | <b>&lt; 0.0001</b> | -0.19 | 0.1  |
| 0-2000                                   | -0.42 | <b>&lt; 0.0001</b> | -0.43 | <b>&lt; 0.0001</b> | -0.48          | <b>&lt; 0.0001</b> | -0.18 | 0.1  |
| 0-2500                                   | -0.40 | <b>0.0003</b>      | -0.44 | <b>&lt; 0.0001</b> | -0.46          | <b>&lt; 0.0001</b> | -0.27 | 0.02 |
